# Supplementary material
Source: PubMed Central journal article supplement (PMC8019211)
Supplement: AET2-5-e10495-s001.pdf [file AET2-5-e10495-s001.pdf]

## APPENDIX S1

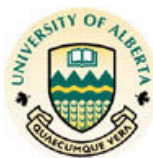

### UNIVERSITY OF ALBERTA

#### Procedural Skills Training in Emergency Medicine Physicians within the Edmonton Zone: A Needs Assessment

If you choose to decline to answer a particular question, simply leave it blank and continue to complete the questions you are comfortable answering.

#### PART A: DEMOGRAPHICS

1. What is your age in years?  
\_\_\_\_\_
2. What is your sex?
  - Male
  - Female
  - Other: \_\_\_\_\_
  - Prefer not to answer
3. What is your postgraduate residency qualification?
  - CCFP
  - CCFP-EM
  - FRCPC –EM
  - Other: \_\_\_\_\_
4. In what country did you complete your residency training?
  - Canada
  - United States
  - Other (please specify): \_\_\_\_\_
5. How many years have you been in practice since graduation from residency?
  - ≤5 years
  - 6-10 years
  - 11-20 years
  - >20 years
6. Which hospital(s) do you work the majority of your shifts at?
  - Tertiary sites (University of Alberta Hospital, Royal Alexandra Hospital)
  - Urban community sites (Grey Nuns Community Hospital, Misericordia Community Hospital, Northeast Community Health Centre, Sturgeon Community Hospital, West View Health Centre)
  - Rural community sites (Devon General Hospital, Fort Saskatchewan Community Hospital, Leduc Community Hospital, Strathcona Community Hospital)
7. In a typical month, how many emergency medicine shifts do you work?
  - <5
  - 6-10
  - 11-15
  - >15



**Question 2. How important do you think this procedural skill is in your practice of emergency medicine?**

**CRITICAL CARE PROCEDURES**

|                                             | Very unimportant         | Somewhat unimportant     | Neither important nor unimportant | Somewhat important       | Very important           |
|---------------------------------------------|--------------------------|--------------------------|-----------------------------------|--------------------------|--------------------------|
| Adult endotracheal intubation               | <input type="checkbox"/> | <input type="checkbox"/> | <input type="checkbox"/>          | <input type="checkbox"/> | <input type="checkbox"/> |
| Arterial line insertion                     | <input type="checkbox"/> | <input type="checkbox"/> | <input type="checkbox"/>          | <input type="checkbox"/> | <input type="checkbox"/> |
| Central line insertion (landmark technique) | <input type="checkbox"/> | <input type="checkbox"/> | <input type="checkbox"/>          | <input type="checkbox"/> | <input type="checkbox"/> |
| Central line insertion (US guided)          | <input type="checkbox"/> | <input type="checkbox"/> | <input type="checkbox"/>          | <input type="checkbox"/> | <input type="checkbox"/> |
| Chest tube insertion                        | <input type="checkbox"/> | <input type="checkbox"/> | <input type="checkbox"/>          | <input type="checkbox"/> | <input type="checkbox"/> |
| Cricothyroidotomy                           | <input type="checkbox"/> | <input type="checkbox"/> | <input type="checkbox"/>          | <input type="checkbox"/> | <input type="checkbox"/> |
| Emergency department thoracotomy            | <input type="checkbox"/> | <input type="checkbox"/> | <input type="checkbox"/>          | <input type="checkbox"/> | <input type="checkbox"/> |
| Pediatric endotracheal intubation           | <input type="checkbox"/> | <input type="checkbox"/> | <input type="checkbox"/>          | <input type="checkbox"/> | <input type="checkbox"/> |
| Pericardiocentesis                          | <input type="checkbox"/> | <input type="checkbox"/> | <input type="checkbox"/>          | <input type="checkbox"/> | <input type="checkbox"/> |
| Transvenous pacing                          | <input type="checkbox"/> | <input type="checkbox"/> | <input type="checkbox"/>          | <input type="checkbox"/> | <input type="checkbox"/> |
| Intraosseous line insertion                 | <input type="checkbox"/> | <input type="checkbox"/> | <input type="checkbox"/>          | <input type="checkbox"/> | <input type="checkbox"/> |

**OTHER PROCEDURES**

|                                    | Very unimportant         | Somewhat unimportant     | Neither important nor unimportant | Somewhat important       | Very important           |
|------------------------------------|--------------------------|--------------------------|-----------------------------------|--------------------------|--------------------------|
| Arthrocentesis                     | <input type="checkbox"/> | <input type="checkbox"/> | <input type="checkbox"/>          | <input type="checkbox"/> | <input type="checkbox"/> |
| Compartment pressure measurement   | <input type="checkbox"/> | <input type="checkbox"/> | <input type="checkbox"/>          | <input type="checkbox"/> | <input type="checkbox"/> |
| Corneal foreign body removal       | <input type="checkbox"/> | <input type="checkbox"/> | <input type="checkbox"/>          | <input type="checkbox"/> | <input type="checkbox"/> |
| Escharotomy                        | <input type="checkbox"/> | <input type="checkbox"/> | <input type="checkbox"/>          | <input type="checkbox"/> | <input type="checkbox"/> |
| Extensor tendon repair             | <input type="checkbox"/> | <input type="checkbox"/> | <input type="checkbox"/>          | <input type="checkbox"/> | <input type="checkbox"/> |
| FAST                               | <input type="checkbox"/> | <input type="checkbox"/> | <input type="checkbox"/>          | <input type="checkbox"/> | <input type="checkbox"/> |
| Lateral canthotomy                 | <input type="checkbox"/> | <input type="checkbox"/> | <input type="checkbox"/>          | <input type="checkbox"/> | <input type="checkbox"/> |
| Posterior nasal pack for epistaxis | <input type="checkbox"/> | <input type="checkbox"/> | <input type="checkbox"/>          | <input type="checkbox"/> | <input type="checkbox"/> |
| Regional nerve block               | <input type="checkbox"/> | <input type="checkbox"/> | <input type="checkbox"/>          | <input type="checkbox"/> | <input type="checkbox"/> |
| Suprapubic bladder catheterization | <input type="checkbox"/> | <input type="checkbox"/> | <input type="checkbox"/>          | <input type="checkbox"/> | <input type="checkbox"/> |
| Thoracentesis                      | <input type="checkbox"/> | <input type="checkbox"/> | <input type="checkbox"/>          | <input type="checkbox"/> | <input type="checkbox"/> |
| Upper airway foreign body removal  | <input type="checkbox"/> | <input type="checkbox"/> | <input type="checkbox"/>          | <input type="checkbox"/> | <input type="checkbox"/> |
| Vaginal delivery                   | <input type="checkbox"/> | <input type="checkbox"/> | <input type="checkbox"/>          | <input type="checkbox"/> | <input type="checkbox"/> |

**Question 3. How confident do you feel when performing this procedure independently?**

**CRITICAL CARE PROCEDURES**

|                                             | Very unconfident         | Somewhat unconfident     | Neither confident nor unconfident | Somewhat confident       | Very confident           |
|---------------------------------------------|--------------------------|--------------------------|-----------------------------------|--------------------------|--------------------------|
| Adult endotracheal intubation               | <input type="checkbox"/> | <input type="checkbox"/> | <input type="checkbox"/>          | <input type="checkbox"/> | <input type="checkbox"/> |
| Arterial line insertion                     | <input type="checkbox"/> | <input type="checkbox"/> | <input type="checkbox"/>          | <input type="checkbox"/> | <input type="checkbox"/> |
| Central line insertion (landmark technique) | <input type="checkbox"/> | <input type="checkbox"/> | <input type="checkbox"/>          | <input type="checkbox"/> | <input type="checkbox"/> |
| Central line insertion (US guided)          | <input type="checkbox"/> | <input type="checkbox"/> | <input type="checkbox"/>          | <input type="checkbox"/> | <input type="checkbox"/> |
| Chest tube insertion                        | <input type="checkbox"/> | <input type="checkbox"/> | <input type="checkbox"/>          | <input type="checkbox"/> | <input type="checkbox"/> |
| Cricothyroidotomy                           | <input type="checkbox"/> | <input type="checkbox"/> | <input type="checkbox"/>          | <input type="checkbox"/> | <input type="checkbox"/> |
| Emergency department thoracotomy            | <input type="checkbox"/> | <input type="checkbox"/> | <input type="checkbox"/>          | <input type="checkbox"/> | <input type="checkbox"/> |
| Pediatric endotracheal intubation           | <input type="checkbox"/> | <input type="checkbox"/> | <input type="checkbox"/>          | <input type="checkbox"/> | <input type="checkbox"/> |
| Pericardiocentesis                          | <input type="checkbox"/> | <input type="checkbox"/> | <input type="checkbox"/>          | <input type="checkbox"/> | <input type="checkbox"/> |
| Transvenous pacing                          | <input type="checkbox"/> | <input type="checkbox"/> | <input type="checkbox"/>          | <input type="checkbox"/> | <input type="checkbox"/> |
| Intraosseous line insertion                 | <input type="checkbox"/> | <input type="checkbox"/> | <input type="checkbox"/>          | <input type="checkbox"/> | <input type="checkbox"/> |

**OTHER PROCEDURES**

|                                    | Very unconfident         | Somewhat unconfident     | Neither confident nor unconfident | Somewhat confident       | Very confident           |
|------------------------------------|--------------------------|--------------------------|-----------------------------------|--------------------------|--------------------------|
| Arthrocentesis                     | <input type="checkbox"/> | <input type="checkbox"/> | <input type="checkbox"/>          | <input type="checkbox"/> | <input type="checkbox"/> |
| Compartment pressure measurement   | <input type="checkbox"/> | <input type="checkbox"/> | <input type="checkbox"/>          | <input type="checkbox"/> | <input type="checkbox"/> |
| Corneal foreign body removal       | <input type="checkbox"/> | <input type="checkbox"/> | <input type="checkbox"/>          | <input type="checkbox"/> | <input type="checkbox"/> |
| Escharotomy                        | <input type="checkbox"/> | <input type="checkbox"/> | <input type="checkbox"/>          | <input type="checkbox"/> | <input type="checkbox"/> |
| Extensor tendon repair             | <input type="checkbox"/> | <input type="checkbox"/> | <input type="checkbox"/>          | <input type="checkbox"/> | <input type="checkbox"/> |
| FAST                               | <input type="checkbox"/> | <input type="checkbox"/> | <input type="checkbox"/>          | <input type="checkbox"/> | <input type="checkbox"/> |
| Lateral canthotomy                 | <input type="checkbox"/> | <input type="checkbox"/> | <input type="checkbox"/>          | <input type="checkbox"/> | <input type="checkbox"/> |
| Posterior nasal pack for epistaxis | <input type="checkbox"/> | <input type="checkbox"/> | <input type="checkbox"/>          | <input type="checkbox"/> | <input type="checkbox"/> |
| Regional nerve block               | <input type="checkbox"/> | <input type="checkbox"/> | <input type="checkbox"/>          | <input type="checkbox"/> | <input type="checkbox"/> |
| Suprapubic bladder catheterization | <input type="checkbox"/> | <input type="checkbox"/> | <input type="checkbox"/>          | <input type="checkbox"/> | <input type="checkbox"/> |
| Thoracentesis                      | <input type="checkbox"/> | <input type="checkbox"/> | <input type="checkbox"/>          | <input type="checkbox"/> | <input type="checkbox"/> |
| Upper airway foreign body removal  | <input type="checkbox"/> | <input type="checkbox"/> | <input type="checkbox"/>          | <input type="checkbox"/> | <input type="checkbox"/> |
| Vaginal delivery                   | <input type="checkbox"/> | <input type="checkbox"/> | <input type="checkbox"/>          | <input type="checkbox"/> | <input type="checkbox"/> |

**PART C: CURRICULUM DEVELOPMENT**

**Question 1. How do you currently maintain competence in procedural skills? Select all that apply.**

- Repeated clinical practice
- Observation (clinical, peer consult, reading, video review)
- Simulation
- Formal courses (e.g. AIME)
- Other, please specify: \_\_\_\_\_
- No method

**Question 2. If there were access to regular procedural simulation training in this particular skill, how frequently would you want simulation practice to maintain competence?**

|                                             | Never                    | Every 6 months           | Every 12 months          | Every 24 months          | Greater than every 24 months |
|---------------------------------------------|--------------------------|--------------------------|--------------------------|--------------------------|------------------------------|
| Adult endotracheal intubation               | <input type="checkbox"/>     |
| Arterial line insertion                     | <input type="checkbox"/>     |
| Arthrocentesis                              | <input type="checkbox"/>     |
| Central line insertion (landmark technique) | <input type="checkbox"/>     |
| Central line insertion (US guided)          | <input type="checkbox"/>     |
| Chest tube insertion                        | <input type="checkbox"/>     |
| Compartment pressure measurement            | <input type="checkbox"/>     |
| Corneal foreign body removal                | <input type="checkbox"/>     |
| Cricothyroidotomy                           | <input type="checkbox"/>     |
| Emergency department thoracotomy            | <input type="checkbox"/>     |
| Escharotomy                                 | <input type="checkbox"/>     |
| Extensor tendon repair                      | <input type="checkbox"/>     |
| FAST                                        | <input type="checkbox"/>     |
| Intraosseous line insertion                 | <input type="checkbox"/>     |
| Lateral canthotomy                          | <input type="checkbox"/>     |
| Pediatric endotracheal intubation           | <input type="checkbox"/>     |
| Pericardiocentesis                          | <input type="checkbox"/>     |
| Posterior nasal pack for epistaxis          | <input type="checkbox"/>     |
| Regional nerve block                        | <input type="checkbox"/>     |
| Suprapubic bladder catheterization          | <input type="checkbox"/>     |
| Thoracentesis                               | <input type="checkbox"/>     |
| Transvenous pacing                          | <input type="checkbox"/>     |
| Upper airway foreign body removal           | <input type="checkbox"/>     |
| Vaginal delivery                            | <input type="checkbox"/>     |

**Question 3. If you could choose the content of a procedural skills curriculum, please rank the top six procedures you would include in the curriculum?**

|                                             |                          |
|---------------------------------------------|--------------------------|
| Adult endotracheal intubation               | <input type="checkbox"/> |
| Arterial line insertion                     | <input type="checkbox"/> |
| Arthrocentesis                              | <input type="checkbox"/> |
| Central line insertion (landmark technique) | <input type="checkbox"/> |
| Central line insertion (US guided)          | <input type="checkbox"/> |
| Chest tube insertion                        | <input type="checkbox"/> |
| Compartment pressure measurement            | <input type="checkbox"/> |
| Corneal foreign body removal                | <input type="checkbox"/> |
| Cricothyroidotomy                           | <input type="checkbox"/> |
| Emergency department thoracotomy            | <input type="checkbox"/> |
| Escharotomy                                 | <input type="checkbox"/> |
| Extensor tendon repair                      | <input type="checkbox"/> |
| FAST                                        | <input type="checkbox"/> |
| Intraosseous line insertion                 | <input type="checkbox"/> |
| Lateral canthotomy                          | <input type="checkbox"/> |
| Pediatric endotracheal intubation           | <input type="checkbox"/> |
| Pericardiocentesis                          | <input type="checkbox"/> |
| Posterior nasal pack for epistaxis          | <input type="checkbox"/> |
| Regional nerve block                        | <input type="checkbox"/> |
| Suprapubic bladder catheterization          | <input type="checkbox"/> |
| Thoracentesis                               | <input type="checkbox"/> |
| Transvenous pacing                          | <input type="checkbox"/> |
| Upper airway foreign body removal           | <input type="checkbox"/> |
| Vaginal delivery                            | <input type="checkbox"/> |

**Question 4. If a procedural skills course were offered, what would be the preferred length of the course?**

- Half a day                       Full day                       Two days

**Question 5. Are there any other procedures that you feel are important but were omitted from the original list? Please specify.**

---



---

**Question 6. Have you participated in a formal procedural skills course in the last two years?**

- No                                               Yes

**If yes, which course did you participate in?**

---

**Questions 7. What are some of your personal barriers to participation in a procedural skills curriculum? Check all that apply.**

- Cost
- Availability of courses
- Time
- Lack of support from department site

Other: \_\_\_\_\_

**Questions 8. What are some of the facilitating factors to participation in a procedural skills curriculum? Check all that apply.**

- CME credit
- Financial support
- On site location of course
- Academic promotion
- Other: \_\_\_\_\_

## APPENDIX S2

**Table 1. Associations between Edmonton zone emergency physician years of practice, perceived importance, desired frequency, frequency performed, and perceived confidence of tertiary site procedural skills in 2019**

|                                                    | Perceived importance and desired frequency |             | Frequency performed and confidence |                   | Frequency performed and desired frequency |               | Years of practice and confidence |               | Perceived confidence and desired frequency |          |
|----------------------------------------------------|--------------------------------------------|-------------|------------------------------------|-------------------|-------------------------------------------|---------------|----------------------------------|---------------|--------------------------------------------|----------|
|                                                    | <i>r</i>                                   | <i>p</i>    | <i>r</i>                           | <i>p</i>          | <i>r</i>                                  | <i>p</i>      | <i>r</i>                         | <i>p</i>      | <i>r</i>                                   | <i>p</i> |
| <b>Adult endotracheal intubation</b>               | 0.10                                       | 0.4         | <b>0.53</b>                        | <b>&lt;0.0001</b> | -0.08                                     | 0.5           | 0.14                             | 0.2           | 0.11                                       | 0.3      |
| <b>Arterial line insertion</b>                     | -0.05                                      | 0.7         | <b>0.58</b>                        | <b>&lt;0.0001</b> | -0.09                                     | 0.5           | -0.09                            | 0.5           | 0.10                                       | 0.4      |
| <b>Arthrocentesis</b>                              | -0.04                                      | 0.7         | <b>0.41</b>                        | <b>0.0004</b>     | 0.03                                      | 0.8           | 0.10                             | 0.4           | 0.07                                       | 0.6      |
| <b>Central line insertion (landmark technique)</b> | 0.08                                       | 0.5         | <b>0.62</b>                        | <b>&lt;0.0001</b> | -0.01                                     | 1.0           | 0.23                             | 0.1           | 0.03                                       | 0.8      |
| <b>Central line insertion (US guided)</b>          | -0.14                                      | 0.3         | <b>0.63</b>                        | <b>&lt;0.0001</b> | -0.11                                     | 0.4           | -0.19                            | 0.1           | -0.10                                      | 0.4      |
| <b>Chest tube insertion</b>                        | -0.08                                      | 0.5         | <b>0.48</b>                        | <b>&lt;0.0001</b> | -0.06                                     | 0.6           | <b>0.28</b>                      | <b>0.02</b>   | -0.02                                      | 0.9      |
| <b>Compartment pressure measurement</b>            | <b>0.27</b>                                | <b>0.02</b> | <b>0.55</b>                        | <b>&lt;0.0001</b> | 0.04                                      | 0.7           | <b>0.29</b>                      | <b>0.02</b>   | 0.15                                       | 0.2      |
| <b>Corneal foreign body removal</b>                | -0.12                                      | 0.3         | <b>0.55</b>                        | <b>&lt;0.0001</b> | -0.15                                     | 0.2           | <b>0.40</b>                      | <b>0.0005</b> | -0.003                                     | 1.0      |
| <b>Cricothyroidotomy</b>                           | -0.03                                      | 0.8         | <b>0.54</b>                        | <b>&lt;0.0001</b> | -0.13                                     | 0.3           | <b>0.27</b>                      | <b>0.02</b>   | -0.07                                      | 0.6      |
| <b>Emergency department thoracotomy</b>            | 0.06                                       | 0.6         | <b>0.69</b>                        | <b>&lt;0.0001</b> | 0.14                                      | 0.2           | 0.13                             | 0.3           | 0.21                                       | 0.1      |
| <b>Escharotomy</b>                                 | 0.12                                       | 0.3         | <b>0.53</b>                        | <b>&lt;0.0001</b> | 0.01                                      | 0.9           | 0.07                             | 0.5           | -0.03                                      | 0.8      |
| <b>Extensor tendon repair</b>                      | 0.13                                       | 0.3         | <b>0.49</b>                        | <b>&lt;0.0001</b> | 0.14                                      | 0.3           | <b>0.24</b>                      | <b>0.04</b>   | -0.02                                      | 0.9      |
| <b>FAST</b>                                        | 0.03                                       | 0.8         | <b>0.66</b>                        | <b>&lt;0.0001</b> | -0.16                                     | 0.2           | <b>-0.27</b>                     | <b>0.02</b>   | -0.05                                      | 0.7      |
| <b>Intraosseous line</b>                           |                                            |             | <b>0.37</b>                        | <b>0.001</b>      | <b>-0.39</b>                              | <b>0.0006</b> | -0.02                            | 0.9           | -0.19                                      | 0.1      |



|                                           |              |             |             |                   |              |             |             |             |       |            |
|-------------------------------------------|--------------|-------------|-------------|-------------------|--------------|-------------|-------------|-------------|-------|------------|
| <b>insertion</b>                          |              |             |             |                   |              |             |             |             |       |            |
| <b>Lateral canthotomy</b>                 | 0.06         | <i>0.6</i>  | <b>0.63</b> | <b>&lt;0.0001</b> | 0.17         | <i>0.1</i>  | -0.20       | <i>0.1</i>  | 0.17  | <i>0.1</i> |
| <b>Pediatric endotracheal intubation</b>  | -0.13        | <i>0.3</i>  | <b>0.56</b> | <b>&lt;0.0001</b> | <b>-0.29</b> | <b>0.01</b> | -0.01       | <i>1.0</i>  | -0.13 | <i>0.3</i> |
| <b>Pericardiocentesis</b>                 | -0.17        | <i>0.2</i>  | <b>0.47</b> | <b>&lt;0.0001</b> | -0.19        | <i>0.1</i>  | 0.15        | <i>0.2</i>  | 0.02  | <i>0.9</i> |
| <b>Posterior nasal pack for epistaxis</b> | -0.14        | <i>0.3</i>  | <b>0.61</b> | <b>&lt;0.0001</b> | <b>-0.28</b> | <b>0.01</b> | <b>0.26</b> | <b>0.03</b> | -0.15 | <i>0.2</i> |
| <b>Regional nerve block</b>               | -0.20        | <i>0.1</i>  | <b>0.67</b> | <b>&lt;0.0001</b> | -0.12        | <i>0.3</i>  | -0.05       | <i>0.7</i>  | 0.05  | <i>0.7</i> |
| <b>Suprapubic bladder catheterization</b> | 0.08         | <i>0.5</i>  | <b>0.52</b> | <b>&lt;0.0001</b> | -0.17        | <i>0.2</i>  | 0.08        | <i>0.5</i>  | 0.03  | <i>0.8</i> |
| <b>Thoracentesis</b>                      | 0.17         | <i>0.2</i>  | <b>0.49</b> | <b>&lt;0.0001</b> | -0.14        | <i>0.2</i>  | 0.20        | <i>0.1</i>  | 0.09  | <i>0.4</i> |
| <b>Transvenous pacing</b>                 | -0.10        | <i>0.4</i>  | <b>0.67</b> | <b>&lt;0.0001</b> | 0.03         | <i>0.8</i>  | 0.19        | <i>0.1</i>  | 0.11  | <i>0.4</i> |
| <b>Upper airway foreign body removal</b>  | <b>-0.29</b> | <b>0.01</b> | <b>0.54</b> | <b>&lt;0.0001</b> | -0.01        | <i>0.9</i>  | <b>0.24</b> | <b>0.04</b> | -0.08 | <i>0.5</i> |
| <b>Vaginal delivery</b>                   | 0.18         | <i>0.1</i>  | 0.16        | <i>0.2</i>        | 0.02         | <i>0.8</i>  | 0.07        | <i>0.6</i>  | 0.14  | <i>0.3</i> |

**Table 2. Associations between Edmonton zone emergency physician years of practice, perceived importance, desired frequency, frequency performed, and perceived confidence of urban community site procedural skills in 2019**

|                                                    | Perceived importance and desired frequency |              | Frequency performed and confidence |                   | Frequency performed and desired frequency |          | Years of practice and confidence |                   | Perceived confidence and desired frequency |            |
|----------------------------------------------------|--------------------------------------------|--------------|------------------------------------|-------------------|-------------------------------------------|----------|----------------------------------|-------------------|--------------------------------------------|------------|
|                                                    | <i>r</i>                                   | <i>p</i>     | <i>r</i>                           | <i>p</i>          | <i>r</i>                                  | <i>p</i> | <i>r</i>                         | <i>p</i>          | <i>r</i>                                   | <i>p</i>   |
| <b>Adult endotracheal intubation</b>               | 0.05                                       | 0.8          | <b>0.55</b>                        | <b>0.001</b>      | 0.03                                      | 0.9      | 0.01                             | <i>1.0</i>        | 0.15                                       | <i>0.4</i> |
| <b>Anterior pack for epistaxis</b>                 | -0.07                                      | 0.7          | <b>0.63</b>                        | <b>0.0001</b>     | -0.03                                     | 0.9      | 0.19                             | <i>0.3</i>        | 0.14                                       | <i>0.4</i> |
| <b>Arterial line insertion</b>                     | -0.24                                      | 0.2          | <b>0.66</b>                        | <b>&lt;0.0001</b> | 0.15                                      | 0.4      | -0.19                            | <i>0.3</i>        | -0.19                                      | <i>0.3</i> |
| <b>Arthrocentesis</b>                              | -0.18                                      | 0.3          | <b>0.41</b>                        | <b>0.02</b>       | -0.18                                     | 0.3      | 0.16                             | <i>0.4</i>        | 0.04                                       | <i>0.8</i> |
| <b>Central line insertion (landmark technique)</b> | 0.03                                       | 0.9          | <b>0.63</b>                        | <b>0.0001</b>     | 0.02                                      | 0.9      | <b>0.40</b>                      | <b>0.02</b>       | 0.31                                       | <i>0.1</i> |
| <b>Central line insertion (US guided)</b>          | -0.25                                      | 0.2          | <b>0.64</b>                        | <b>&lt;0.0001</b> | -0.25                                     | 0.2      | <b>-0.52</b>                     | <b>0.003</b>      | -0.15                                      | <i>0.4</i> |
| <b>Chest tube insertion</b>                        | -0.14                                      | 0.5          | <b>0.56</b>                        | <b>0.0009</b>     | 0.01                                      | 1.0      | 0.04                             | <i>0.8</i>        | 0.06                                       | <i>0.7</i> |
| <b>Compartment pressure measurement</b>            | 0.12                                       | 0.5          | <b>0.74</b>                        | <b>&lt;0.0001</b> | -0.02                                     | 0.9      | 0.22                             | <i>0.2</i>        | 0.05                                       | <i>0.8</i> |
| <b>Corneal foreign body removal</b>                | -0.26                                      | 0.2          | <b>0.36</b>                        | <b>0.045</b>      | -0.18                                     | 0.3      | <b>0.36</b>                      | <b>0.04</b>       | -0.16                                      | <i>0.4</i> |
| <b>Cricothyroidotomy</b>                           | 0.11                                       | 0.5          | <b>0.51</b>                        | <b>0.003</b>      | 0.22                                      | 0.2      | -0.10                            | <i>0.6</i>        | 0.04                                       | <i>0.8</i> |
| <b>Ear/nose foreign body removal</b>               | <b>-0.35</b>                               | <b>0.049</b> | <b>0.61</b>                        | <b>0.0002</b>     | -0.30                                     | 0.1      | 0.07                             | <i>0.7</i>        | -0.16                                      | <i>0.4</i> |
| <b>Extensor tendon repair</b>                      | -0.21                                      | 0.3          | <b>0.71</b>                        | <b>&lt;0.0001</b> | -0.01                                     | 0.9      | <b>0.39</b>                      | <b>0.03</b>       | -0.19                                      | <i>0.3</i> |
| <b>FAST</b>                                        | -0.26                                      | 0.1          | <b>0.77</b>                        | <b>&lt;0.0001</b> | -0.30                                     | 0.1      | <b>-0.64</b>                     | <b>&lt;0.0001</b> | -0.14                                      | <i>0.5</i> |
| <b>Intraosseous line</b>                           | -0.14                                      | 0.4          | <b>0.69</b>                        | <b>&lt;0.0001</b> | 0.02                                      | 0.9      | -0.16                            | <i>0.4</i>        | -0.17                                      | <i>0.4</i> |

|                                           |       |     |              |                   |       |     |              |             |              |     |
|-------------------------------------------|-------|-----|--------------|-------------------|-------|-----|--------------|-------------|--------------|-----|
| <b>insertion</b>                          |       |     |              |                   |       |     |              |             |              |     |
| <b>Lateral canthotomy</b>                 | -0.25 | 0.2 | 0.31         | 0.1               | 0.33  | 0.1 | -0.12        | 0.5         | 0.31         | 0.1 |
| <b>Pediatric endotracheal intubation</b>  | 0.06  | 0.8 | <b>0.59</b>  | <b>0.0004</b>     | -0.06 | 0.8 | -0.03        | 0.9         | 0.21         | 0.3 |
| <b>Posterior nasal pack for epistaxis</b> | -0.11 | 0.5 | <b>0.78</b>  | <b>&lt;0.0001</b> | 0.04  | 0.8 | <b>0.41</b>  | <b>0.02</b> | 0.13         | 0.5 |
| <b>Procedural sedation</b>                | -0.27 | 0.1 | <sup>a</sup> |                   | -0.06 | 0.7 | <sup>a</sup> |             | <sup>a</sup> |     |
| <b>Regional nerve block</b>               | 0.02  | 0.9 | <b>0.68</b>  | <b>&lt;0.0001</b> | -0.19 | 0.3 | 0.14         | 0.4         | 0.08         | 0.7 |
| <b>Thoracentesis</b>                      | 0.01  | 0.9 | <b>0.53</b>  | <b>0.002</b>      | 0.16  | 0.4 | 0.05         | 0.8         | -0.10        | 0.6 |
| <b>Transcutaneous pacing</b>              | -0.26 | 0.2 | 0.23         | 0.2               | -0.34 | 0.1 | 0.08         | 0.7         | -0.04        | 0.8 |
| <b>Transvenous pacing</b>                 | -0.16 | 0.4 | <b>0.59</b>  | <b>0.0005</b>     | -0.11 | 0.6 | -0.22        | 0.2         | 0.07         | 0.7 |
| <b>Vaginal delivery</b>                   | -0.01 | 0.9 | <b>0.44</b>  | <b>0.01</b>       | 0.08  | 0.7 | 0.31         | 0.1         | 0.02         | 0.9 |

<sup>a</sup> All survey participants responded “very confident,” thus no correlation.

**Table 3. Associations between Edmonton zone emergency physician years of practice, perceived importance, desired frequency, frequency performed, and perceived confidence of rural community site procedural skills in 2019**

|                                           | Perceived importance and desired frequency |             | Frequency performed and confidence |                   | Frequency performed and desired frequency |             | Years of practice and confidence |             | Perceived confidence and desired frequency |            |
|-------------------------------------------|--------------------------------------------|-------------|------------------------------------|-------------------|-------------------------------------------|-------------|----------------------------------|-------------|--------------------------------------------|------------|
|                                           | <i>r</i>                                   | <i>p</i>    | <i>r</i>                           | <i>p</i>          | <i>r</i>                                  | <i>p</i>    | <i>r</i>                         | <i>p</i>    | <i>r</i>                                   | <i>p</i>   |
| <b>Abscess incision and drainage</b>      | 0.01                                       | <i>1.0</i>  | -0.18                              | <i>0.3</i>        | -0.08                                     | <i>0.6</i>  | -0.10                            | <i>0.5</i>  | 0.12                                       | <i>0.4</i> |
| <b>Adult endotracheal intubation</b>      | 0.06                                       | <i>0.7</i>  | 0.14                               | <i>0.4</i>        | -0.24                                     | <i>0.1</i>  | 0.002                            | <i>1.0</i>  | 0.06                                       | <i>0.7</i> |
| <b>Anterior pack for epistaxis</b>        | 0.24                                       | <i>0.1</i>  | 0.15                               | <i>0.4</i>        | 0.16                                      | <i>0.3</i>  | -0.04                            | <i>0.8</i>  | 0.15                                       | <i>0.3</i> |
| <b>Arthrocentesis</b>                     | 0.09                                       | <i>0.6</i>  | 0.24                               | <i>0.1</i>        | <b>-0.41</b>                              | <b>0.01</b> | 0.01                             | <i>1.0</i>  | 0.26                                       | <i>0.1</i> |
| <b>Central line insertion (US guided)</b> | 0.15                                       | <i>0.3</i>  | <b>0.37</b>                        | <b>0.02</b>       | -0.11                                     | <i>0.5</i>  | <b>-0.32</b>                     | <b>0.04</b> | -0.05                                      | <i>0.7</i> |
| <b>Chest tube insertion</b>               | 0.16                                       | <i>0.3</i>  | 0.12                               | <i>0.4</i>        | -0.19                                     | <i>0.2</i>  | 0.13                             | <i>0.4</i>  | 0.08                                       | <i>0.6</i> |
| <b>Corneal foreign body removal</b>       | -0.16                                      | <i>0.3</i>  | 0.20                               | <i>0.2</i>        | -0.28                                     | <i>0.1</i>  | 0.27                             | <i>0.1</i>  | 0.09                                       | <i>0.6</i> |
| <b>Cricothyroidotomy</b>                  | 0.06                                       | <i>0.7</i>  | <b>0.50</b>                        | <b>0.0008</b>     | 0.19                                      | <i>0.2</i>  | 0.02                             | <i>0.9</i>  | 0.13                                       | <i>0.4</i> |
| <b>Ear/nose foreign body removal</b>      | 0.07                                       | <i>0.7</i>  | 0.19                               | <i>0.2</i>        | 0.07                                      | <i>0.7</i>  | 0.12                             | <i>0.4</i>  | 0.12                                       | <i>0.5</i> |
| <b>Electrical cardioversion</b>           | 0.04                                       | <i>0.8</i>  | <b>0.47</b>                        | <b>0.002</b>      | -0.04                                     | <i>0.8</i>  | -0.19                            | <i>0.2</i>  | -0.11                                      | <i>0.5</i> |
| <b>Electrical defibrillation</b>          | 0.28                                       | <i>0.1</i>  | 0.30                               | <i>0.1</i>        | -0.14                                     | <i>0.4</i>  | -0.22                            | <i>0.2</i>  | 0.14                                       | <i>0.4</i> |
| <b>Extensor tendon repair</b>             | <b>0.33</b>                                | <b>0.04</b> | <b>0.64</b>                        | <b>&lt;0.0001</b> | -0.27                                     | <i>0.1</i>  | 0.08                             | <i>0.6</i>  | -0.20                                      | <i>0.2</i> |
| <b>Fracture reduction</b>                 | 0.19                                       | <i>0.2</i>  | 0.29                               | <i>0.1</i>        | 0.09                                      | <i>0.6</i>  | -0.20                            | <i>0.2</i>  | 0.01                                       | <i>0.9</i> |
| <b>Intraosseous line insertion</b>        | 0.05                                       | <i>0.7</i>  | <b>0.31</b>                        | <b>0.04</b>       | -0.02                                     | <i>0.9</i>  | <b>-0.32</b>                     | <b>0.04</b> | -0.12                                      | <i>0.5</i> |
| <b>Joint reduction</b>                    | 0.03                                       | <i>0.8</i>  | 0.16                               | <i>0.3</i>        | 0.07                                      | <i>0.7</i>  | -0.17                            | <i>0.3</i>  | 0.18                                       | <i>0.3</i> |

|                                           |       |     |             |             |              |             |       |     |        |     |
|-------------------------------------------|-------|-----|-------------|-------------|--------------|-------------|-------|-----|--------|-----|
| <b>Lumbar puncture</b>                    | -0.02 | 0.9 | 0.24        | 0.1         | 0.15         | 0.4         | 0.12  | 0.5 | -0.23  | 0.2 |
| <b>Nail procedures</b>                    | 0.08  | 0.6 | 0.08        | 0.6         | 0.13         | 0.4         | 0.12  | 0.5 | 0.00   | 1.0 |
| <b>Pediatric endotracheal intubation</b>  | 0.12  | 0.5 | <b>0.35</b> | <b>0.02</b> | -0.02        | 0.9         | 0.13  | 0.4 | -0.003 | 1.0 |
| <b>Posterior nasal pack for epistaxis</b> | 0.01  | 0.9 | <b>0.35</b> | <b>0.02</b> | -0.12        | 0.5         | 0.12  | 0.4 | -0.14  | 0.4 |
| <b>Procedural sedation</b>                | 0.25  | 0.1 | 0.29        | 0.1         | 0.28         | 0.1         | -0.25 | 0.1 | 0.17   | 0.3 |
| <b>Regional nerve block</b>               | 0.07  | 0.7 | 0.22        | 0.2         | 0.14         | 0.4         | 0.04  | 0.8 | -0.18  | 0.3 |
| <b>Transcutaneous pacing</b>              | 0.01  | 0.9 | <b>0.35</b> | <b>0.02</b> | <b>-0.32</b> | <b>0.04</b> | 0.10  | 0.5 | 0.07   | 0.6 |
| <b>Vaginal delivery</b>                   | -0.05 | 0.8 | 0.27        | 0.1         | -0.15        | 0.3         | 0.30  | 0.1 | -0.02  | 0.9 |
